# Supplementary material for: Evolution of Cost-Free Resistance under Fluctuating Drug Selection in Pseudomonas aeruginosa
Source: PubMed Central journal article supplement (PMC5518267; doi:10.1128/msphere.00158-17), 2017-07-19

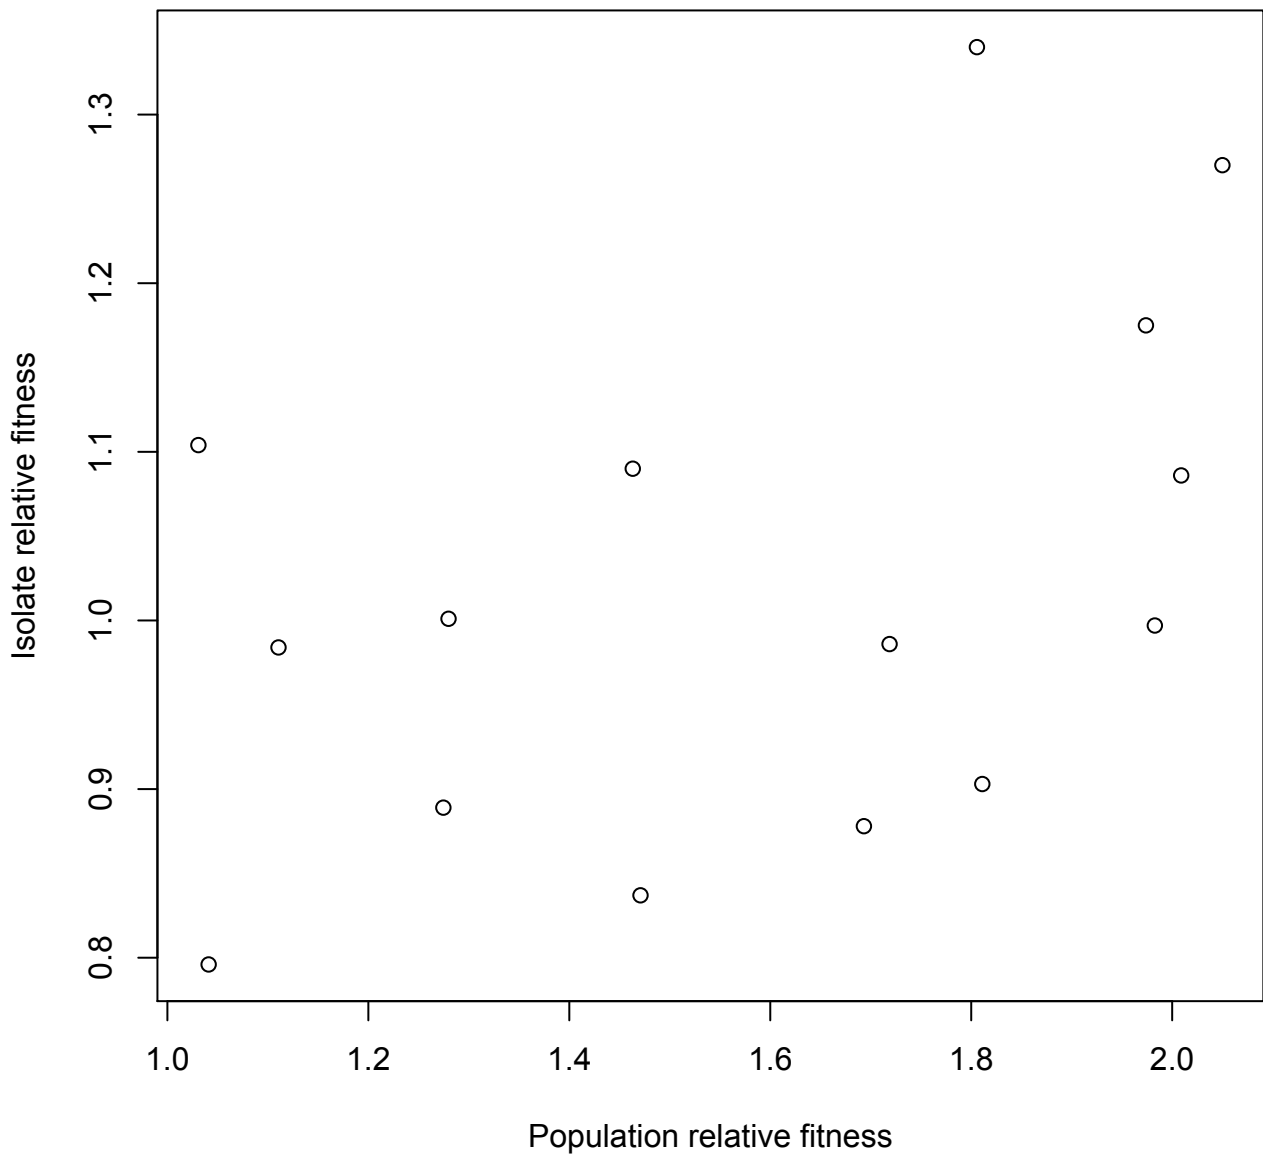

Supplement: sph004172317sf2.pdf [file sph004172317sf2.pdf]
